# Supplementary material for: A significant enhancement of bulk charge separation in photoelectrocatalysis by ferroelectric polarization induced in CdS/BaTiO3 nanowires
Source: Royal Society of Chemistry journal article supplement (doi:10.1039/d1ra04561j), 2021-01-01
Supplement: d1ra04561j1.pdf [file d1ra04561j1.pdf]

## Supporting Information

### A significant enhancement of bulk charge separation in photoelectrocatalysis by ferroelectric polarization induced in CdS/BaTiO<sub>3</sub> nanowires

Zhiqi Jiang<sup>a,b</sup>, Zhaohui Xiao<sup>a,b</sup>, Zui Tao<sup>a,b</sup>, Xu Zhang<sup>a,b</sup> and Shiwei Lin<sup>a,b\*</sup>

<sup>a</sup> State Key Laboratory of Marine Resource Utilization in South China Sea, Hainan University, Haikou 570228, Hainan, China

<sup>b</sup> School of Materials Science and Engineering, Hainan University, Haikou 570228, Hainan, China

(Summary of Content: 9 pages, 15 Figures)

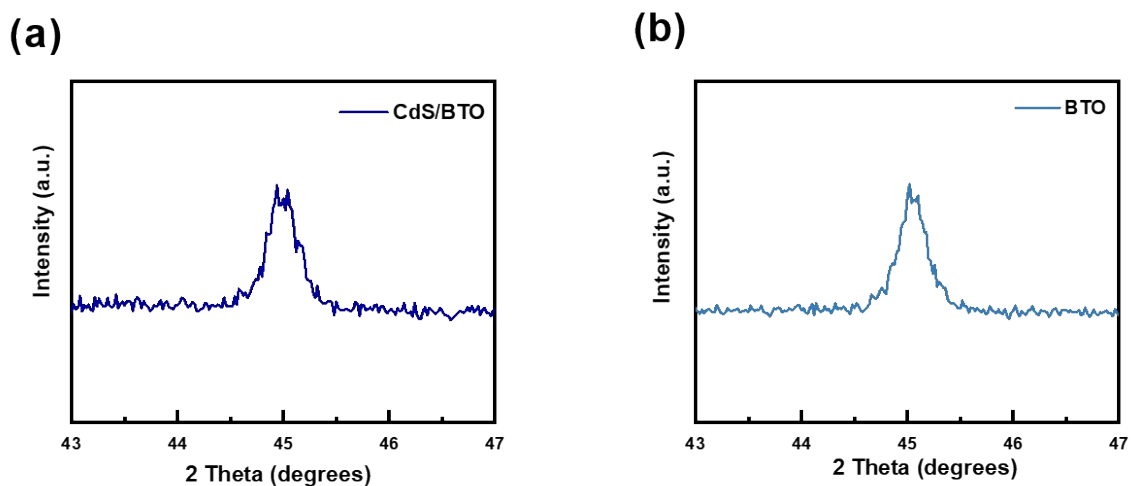

**Figure S1.** XRD patterns of (a) the CdS/BTO, (b) BTO NWs samples around 45°.

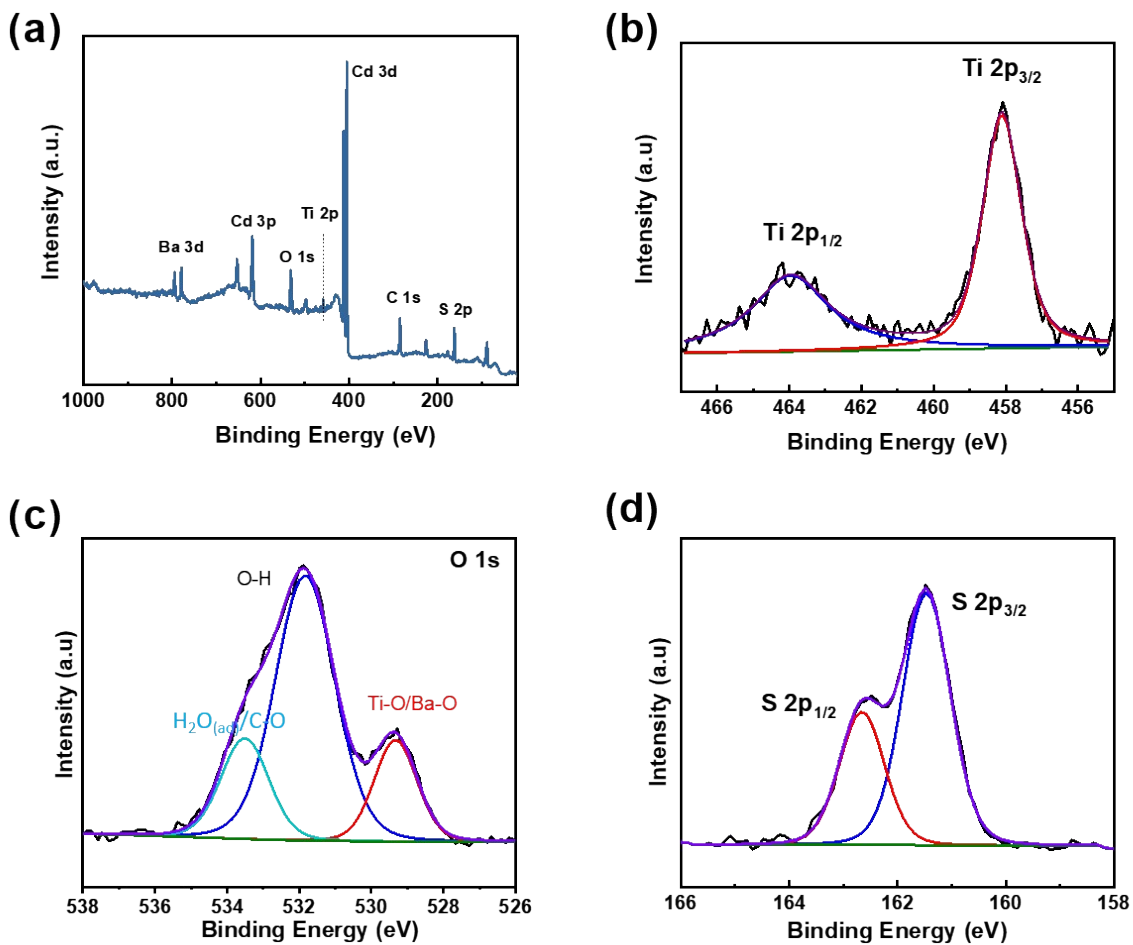

Fig. S2 XPS spectra of the CdS/BTO NWs samples: (a) Survey scan, (b) Ti 2p, (c) O 1s, and (d) S 2p.

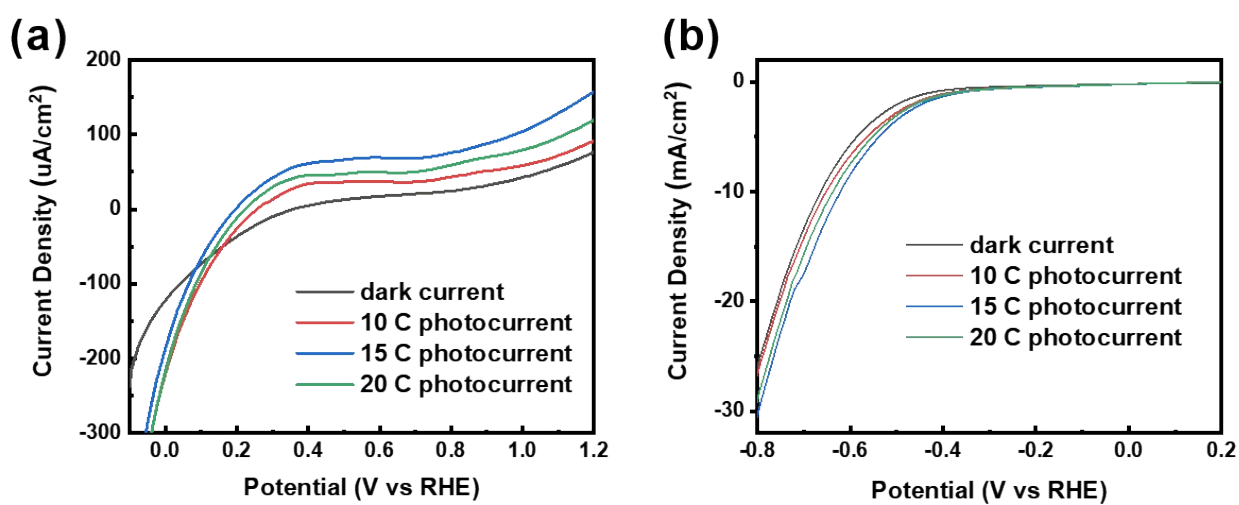

**Fig. S3** LSV curves of the 10 C, 15 C, 20 C CdS/BTO NWs samples in (a) positive voltage section (-0.1 V to +1.2 V), and (b) negative voltage section (0.2 V to -0.8 V).

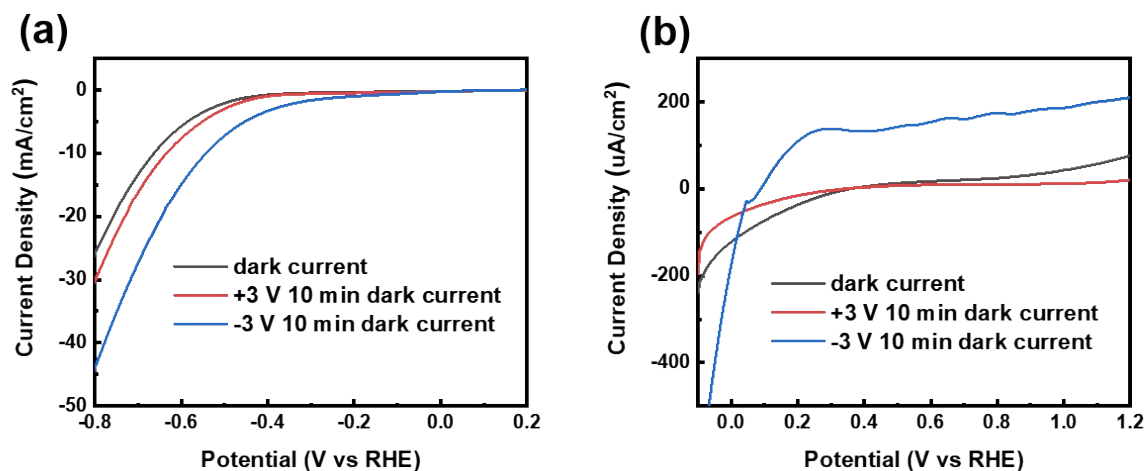

**Fig. S4** Dark current of the CdS/BTO NWs samples after different polarizations in (a) negative voltage section (0.2 V to -0.8 V) and (b) positive voltage section (-0.1 V to +1.2 V).

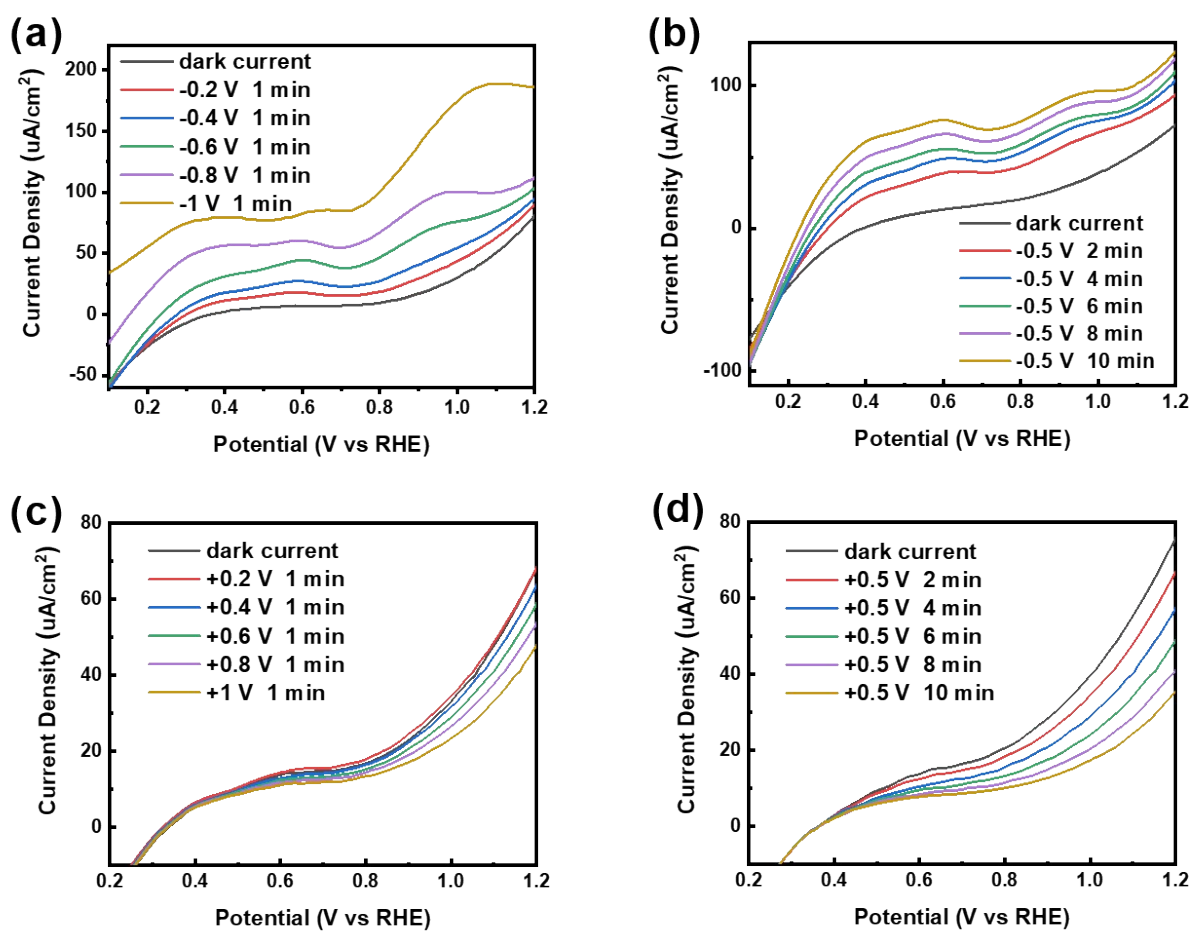

**Fig. S5** LSV curves in the dark with (a) -0.2, -0.4, -0.6, -0.8, -1 V polarization for 1 min, (b) -0.5 V polarization for 2, 4, 6, 8, 10 min, (c) +0.2, +0.4, +0.6, +0.8, +1 V polarization for 1 min, and (d) +0.5 V polarization for 2, 4, 6, 8, 10 min, respectively.

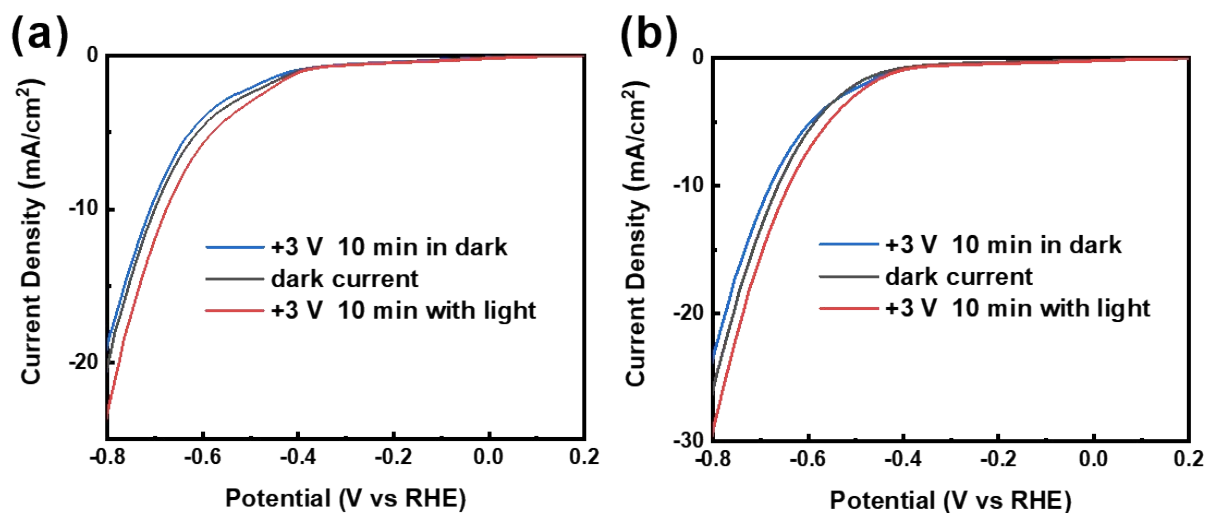

**Fig. S6** LSV curves with +3 V polarization of (a) the BTO NWs and (b) CdS/BTO NWs samples.

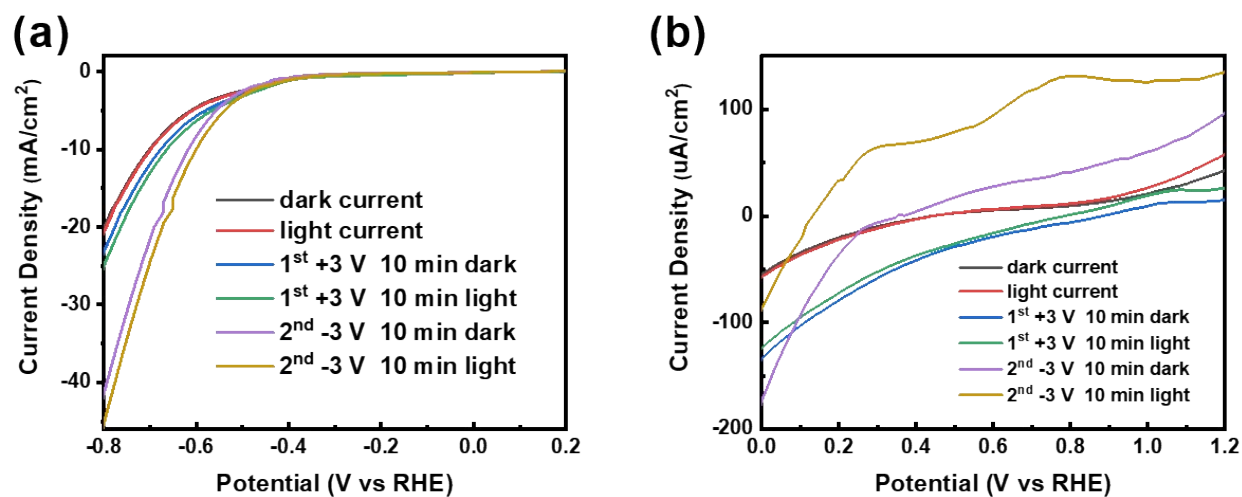

**Fig. S7** LSV curves of the pure BTO NWs samples after different polarizations in (a) negative voltage section (0.2 V to -0.8 V) and (b) positive voltage section (-0.1 V to +1.2 V).

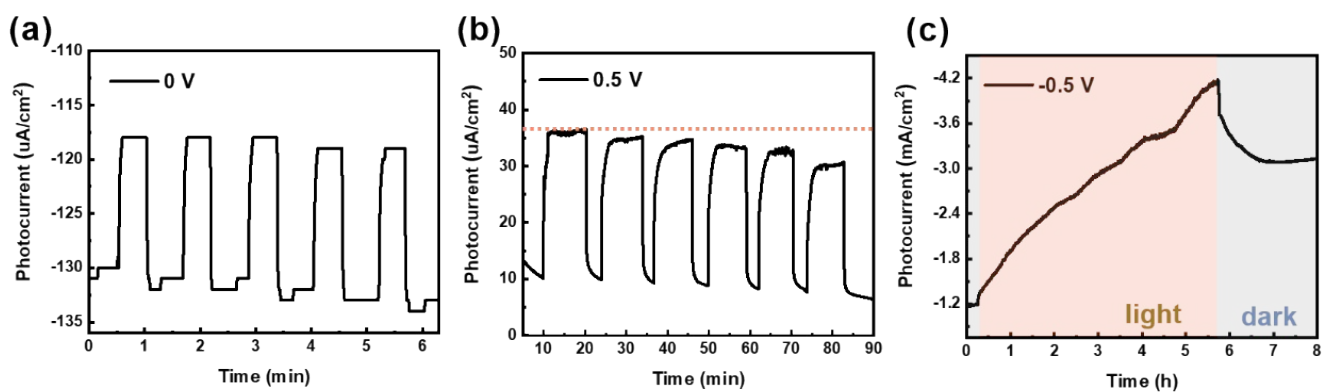

**Fig. S8** Photocurrent densities of the CdS/BTO NWs samples at (a) 0 V, (b) +0.5 V, and (c) -0.5 V bias.

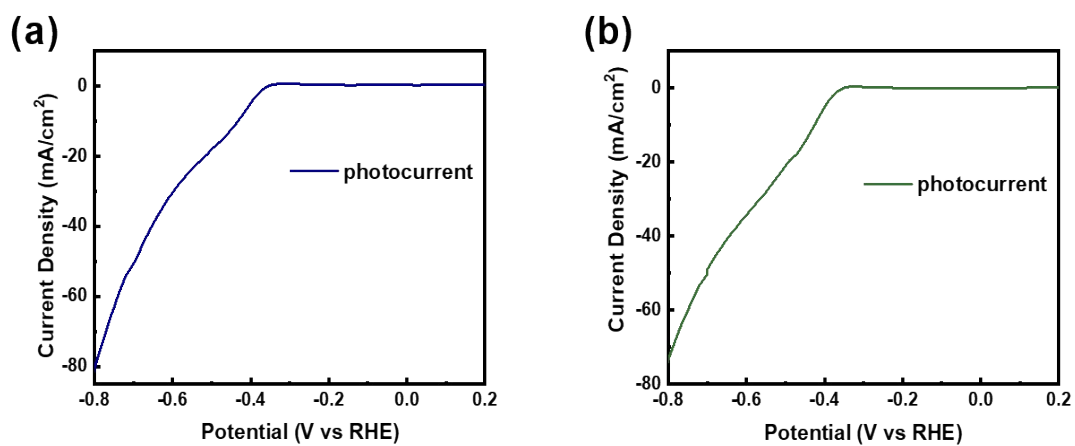

**Fig. S9** The photocurrent densities of CdS/BTO NWs samples with (a) -3 V/-3 V/+3 V and (b) +3 V/+3 V/-3 V polarizations after two months.

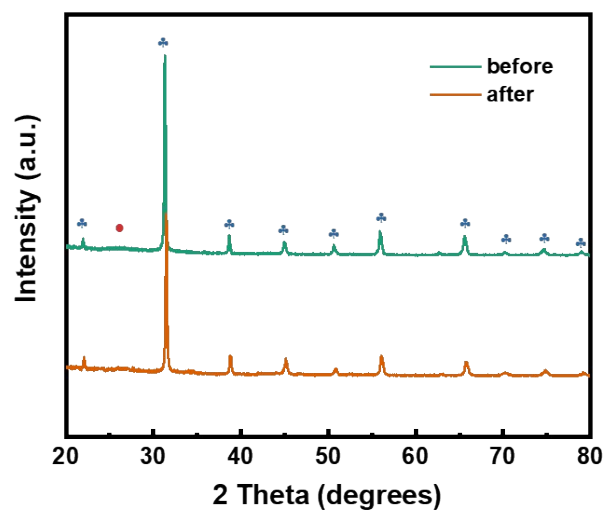

**Fig. S10** XRD patterns of the CdS/BTO NWs sample before and after polarization.

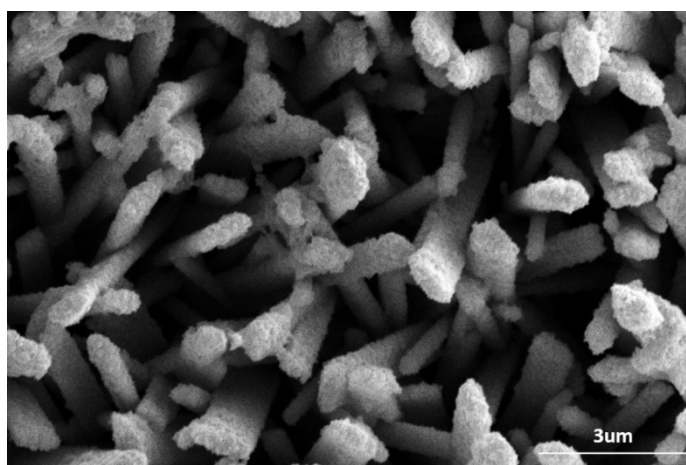

**Fig. S11** SEM image of the CdS/BTO NWs sample after polarization.

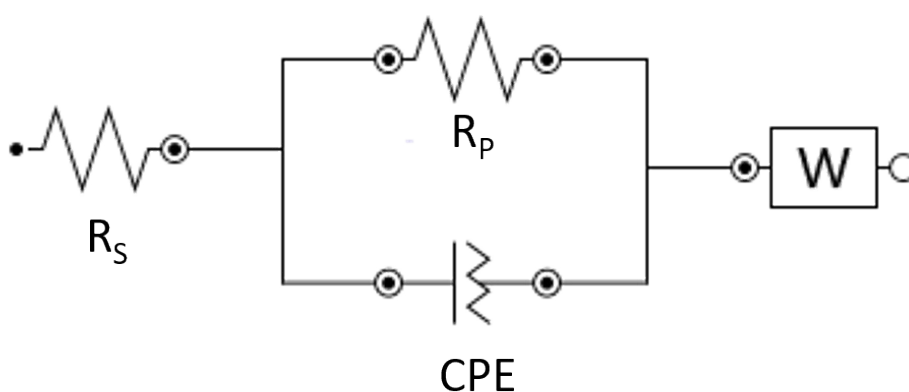

**Fig. S12** The equivalent circuit used for modeling the measured electrochemical response.  $R_p$  is related with the kinetics of the interfacial charge transfer reaction,  $R_s$  represents solution resistance. CPE and W represent the pseudocapacitance and Warburg impedance, respectively.

**Table. S1** Summary of the impedance fitting data for the CdS/BTO NWs samples.

| Sample                    | $R_p$ ( $\Omega$ ) | $R_s$ ( $\Omega$ ) | $CPE_p$ (mF) |
|---------------------------|--------------------|--------------------|--------------|
| dark current              | 1333.00            | 1.78520            | 0.06534      |
| photocurrent              | 730.870            | 2.99120            | 0.11769      |
| 1 <sup>st</sup> +3V 10min | 1520.30            | 1.53840            | 0.05509      |
| +1V 3min                  | 1229.10            | 2.78370            | 0.01561      |
| +0.5V 3min                | 900.730            | 1.46280            | 0.39652      |
| -0.5V 3min                | 490.030            | 1.98660            | 0.02070      |
| -1V 3min                  | 402.040            | 1.53260            | 0.02089      |
| 1 <sup>st</sup> -3V 10min | 30.8510            | 3.05340            | 0.14456      |

|                           |         |         |         |
|---------------------------|---------|---------|---------|
| 2 <sup>nd</sup> -3V 10min | 27.3430 | 2.74870 | 0.09363 |
| 2 <sup>nd</sup> +3V 10min | 2019.70 | 3.68880 | 0.06978 |

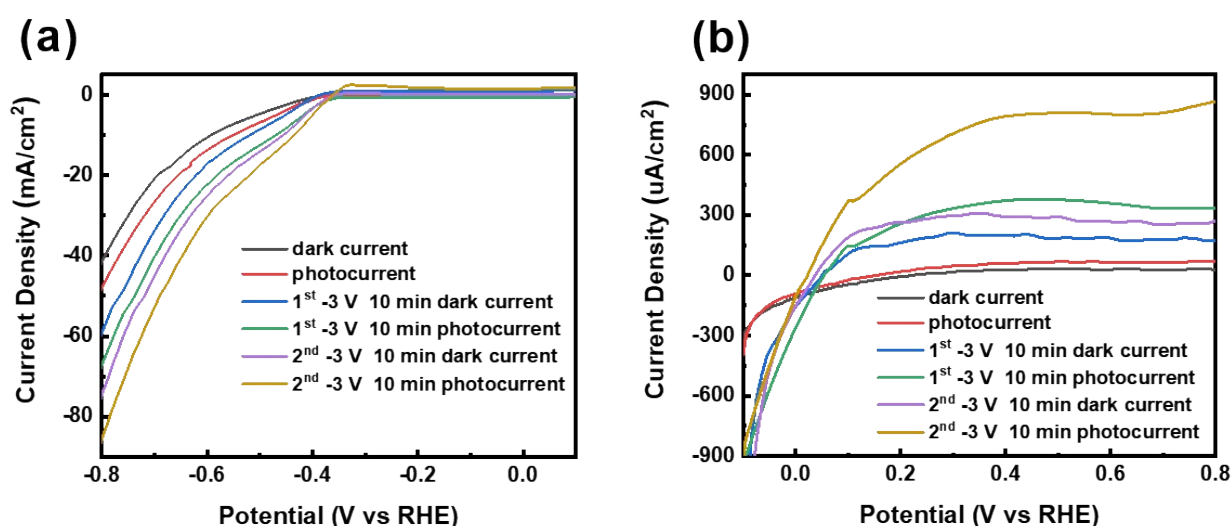

**Fig. S13** LSV curves of the CdS/BTO NWs samples measured in 1 M Na<sub>2</sub>SO<sub>3</sub> electrolyte in (a) negative voltage section (0.1 V to -0.8 V) and (b) positive voltage section (-0.1 V to +0.8 V).

As present in Fig. S13, under the unpolarized condition, the photocurrent at -0.8 V<sub>(vs.RHE)</sub> can reached 47.71 mA/cm<sup>2</sup>, which is 6.55 mA more than that of the dark current (41.16 mA/cm<sup>2</sup>) and the photocurrent at +0.8V<sub>(vs.RHE)</sub> is 71.51 uA/cm<sup>2</sup>, 43.01 uA higher than the dark current (28.49 uA/cm<sup>2</sup>). When we look at the case of the first polarization at -3 V for 10 min polarization, the photocurrent at -0.8 V<sub>(vs.RHE)</sub> increases



to  $66.75 \text{ mA/cm}^2$ , which is  $7.9 \text{ mA/cm}^2$  higher than that of the dark current ( $58.84 \text{ mA/cm}^2$ ). The photocurrent at  $+0.8 \text{ V}_{(\text{vs.RHE})}$  is  $170.97 \text{ uA/cm}^2$ ,  $162.36 \text{ uA/cm}^2$  larger than the dark current. The experiment adopts the method of applying polarization twice. Then the photocurrent at  $-0.8 \text{ V}_{(\text{vs.RHE})}$  increases by  $11.07 \text{ mA/cm}^2$  compared with the dark current, which are  $74.3$  and  $85.37 \text{ mA/cm}^2$ , respectively. Meanwhile, the difference of the photocurrent and dark current at  $+0.8 \text{ V}$  is  $597.85 \text{ uA/cm}^2$ , which are  $267.74$  and  $865.59 \text{ uA/cm}^2$ , respectively.

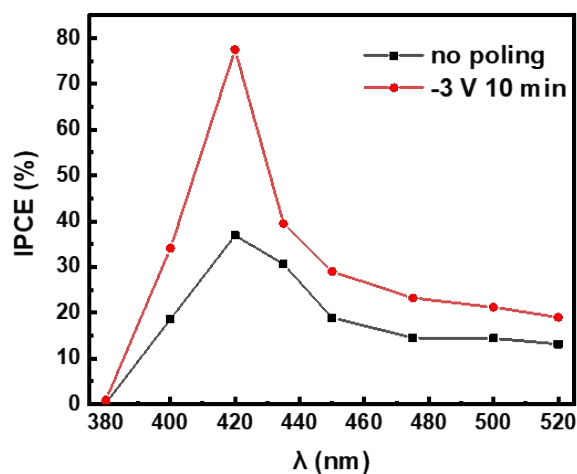

**Fig. S14** IPCE spectra measured at 0 V<sub>(vs.RHE)</sub> for CdS/BTO NWs with no poling and after negative polarization with -3 V for 10 min.

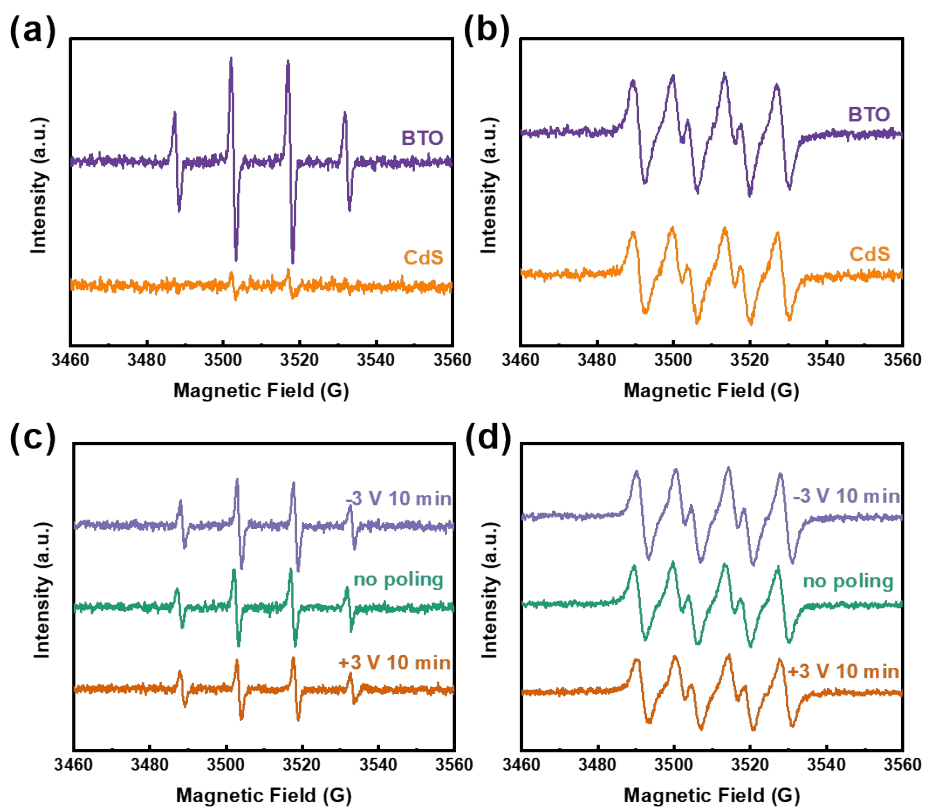

**Fig. S15** ESR spectra of the pure BTO and CdS samples under light irradiation for detection of (a)  $\bullet\text{OH}$ , (b)  $\bullet\text{-O}_2$ . ESR spectra of the CdS/BTO NWs samples with no poling and polarization at +3 V/-3 V for 10 min under light irradiation for detection of (c)  $\bullet\text{OH}$  and (d)  $\bullet\text{-O}_2$ .
